# Supplementary material for: SnS2 nanosheet-based microstructures with high adsorption capabilities and visible light photocatalytic activities
Source: Royal Society of Chemistry journal article supplement (doi:10.1039/c5ra00395d), 2015-01-01
Supplement: c5ra00395d1.pdf [file c5ra00395d1.pdf]

## Supporting Information

### **The SnS<sub>2</sub> nanosheet-based microstructures with high adsorption capabilities and visible light photocatalytic activities**

Zhengcui Wu,<sup>\*a,b</sup> Yejing Xue,<sup>a</sup> Yali Zhang,<sup>a</sup> Jingjing Li<sup>a</sup> and Tao Chen<sup>\*b</sup>

*a Anhui Key Laboratory of Molecule-Based Materials, The Key Laboratory of Functional Molecular Solids, Ministry of Education, College of Chemistry and Materials Science, Anhui Normal University, Wuhu 241000, P. R. China*

*b Department of Physics, The Chinese University of Hong Kong, Shatin, N.T., Hong Kong, China*

\*E-mail: zhengcui@mail.ahnu.edu.cn (Z. Wu), taochen@phy.cuhk.edu.hk (T. Chen).

**Table S1** The synthetic conditions, shape and size of the samples

| Sample | $\text{C}_5\text{H}_{10}\text{NS}_2\text{Na}\cdot 3\text{H}_2\text{O}$<br>(mmol) | $\text{SnCl}_4\cdot 5\text{H}_2\text{O}$<br>(mmol) | Ethylene glycol<br>(mL) | Acetic acid<br>(mL) | Shape     | Size              |
|--------|----------------------------------------------------------------------------------|----------------------------------------------------|-------------------------|---------------------|-----------|-------------------|
| 1      | 1.5                                                                              | 1                                                  | 30                      | 0                   | flower    | 1.5 $\mu\text{m}$ |
| 2      | 2                                                                                | 1                                                  | 30                      | 0                   | nanosheet | 500 nm            |
| 3      | 1.5                                                                              | 1                                                  | 25                      | 5                   | nest      | 800 nm            |
| 4      | 2                                                                                | 1                                                  | 25                      | 5                   | nanoplate | 200 nm            |

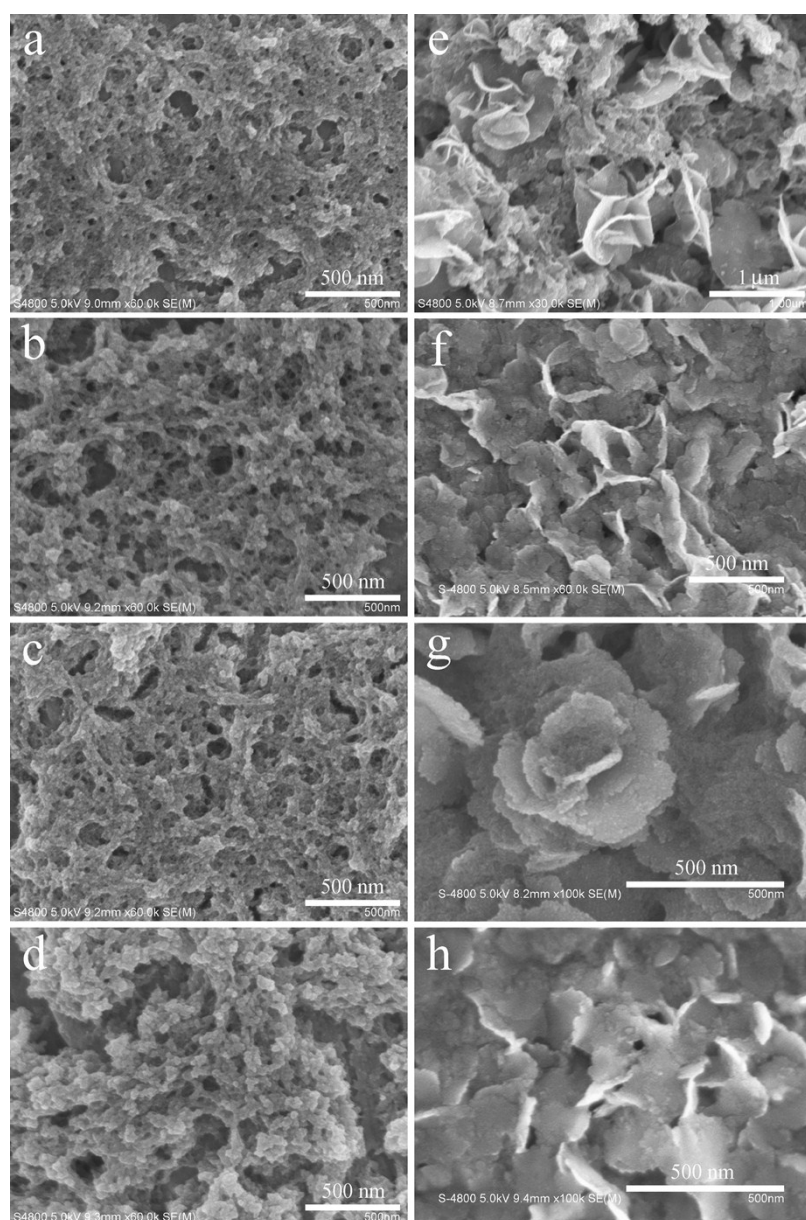

**Fig. S1** Typical FESEM images of the products collected at different reaction times. (a-d) 2 h for sample 1 to 4, respectively, (e-h) 4 h for sample 1 to 4, respectively.

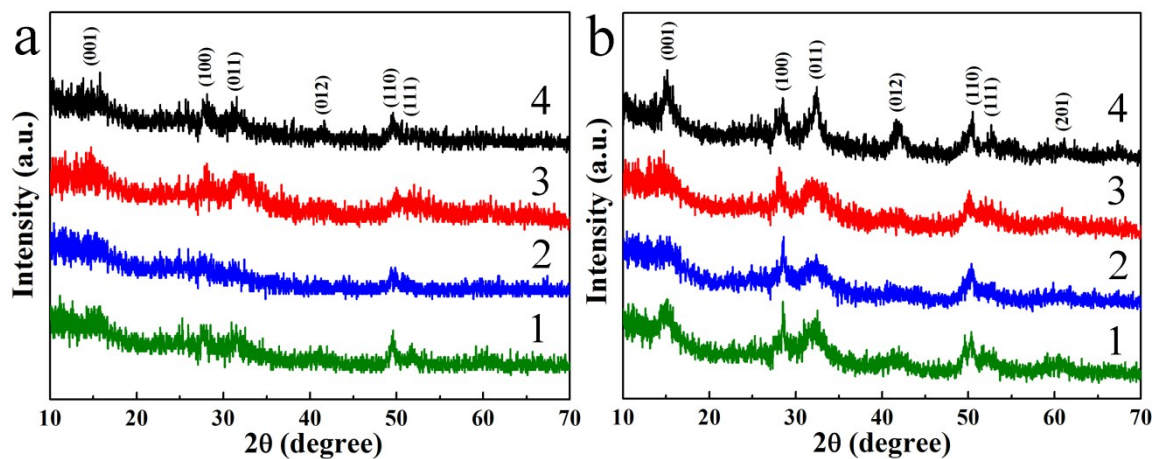

**Fig. S2** Time-dependent XRD patterns of as-prepared SnS<sub>2</sub> nanosheet-based microstructures. (a) 2h, (b) 4h. The numbers 1 to 4 represented for sample 1 to 4, respectively.

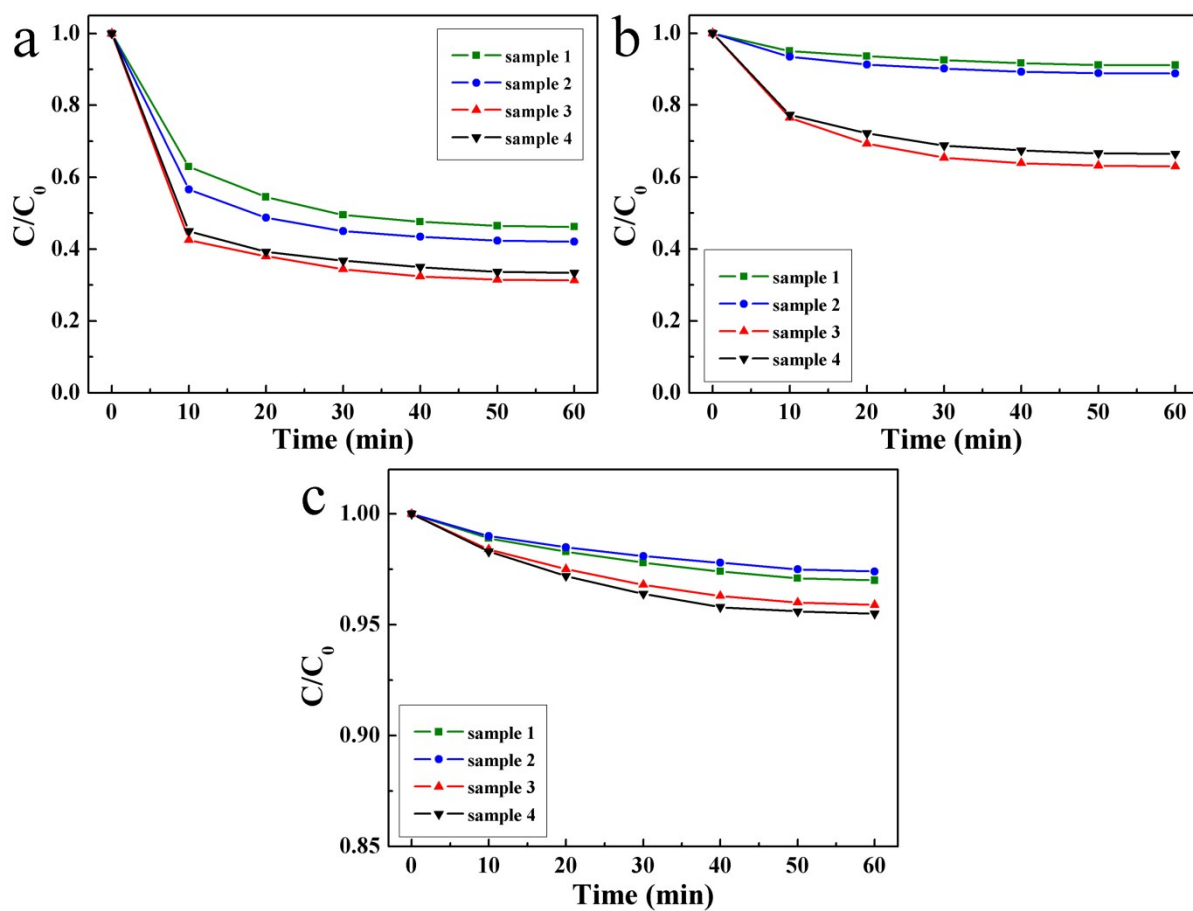

**Fig. S3** Adsorption rate curves of as-prepared SnS<sub>2</sub> nanosheet-based microstructures in different dye solutions. (a) MB, (b) RhB, (c) MO.

**Table S2** The adsorption capacity, photocatalytic degradation and total removal of MB, RhB, MO and phenol from the solution with the samples

| Sample | MB    |       |       | RhB   |       |       | MO   |       |       | phenol |      |      |
|--------|-------|-------|-------|-------|-------|-------|------|-------|-------|--------|------|------|
|        | A     | P     | T     | A     | P     | T     | A    | P     | T     | A      | P    | T    |
| 1      | 53.8% | 54.3% | 78.9% | 16.3% | 76.2% | 80.1% | 3.0% | 22.4% | 24.7% | 0.7%   | 1.4% | 2.1% |
| 2      | 57.9% | 76.0% | 89.9% | 20.2% | 76.8% | 81.5% | 2.6% | 14.2% | 16.4% | 0.8%   | 1.2% | 2.8% |
| 3      | 68.7% | 78.3% | 92.8% | 58.4% | 83.9% | 93.3% | 4.1% | 29.5% | 32.4% | 1.7%   | 1.5% | 3.2% |
| 4      | 66.6% | 84.7% | 94.9% | 54.0% | 89.1% | 95.0% | 4.5% | 21.3% | 24.8% | 1.5%   | 1.7% | 3.1% |

Note: A, P, T-abbreviation for adsorption capacity, photocatalytic degradation and total removal, respectively.

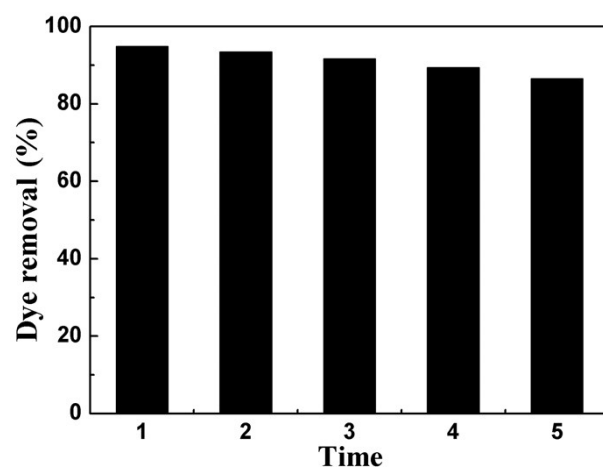

**Fig. S4** Cycling results of MB removal from the solution with sample 4.
